# Supplementary material for: Age matters: Life-stage, tissue, and sex-specific gene expression dynamics in Ips typographus (Coleoptera: Curculionidae: Scolytinae)
Source: Frontiers journal article supplement (doi:10.3389/ffgc.2023.1124754), 2023-03-14
Supplement: Data_Sheet_5.xlsx [file Data_Sheet_5.xlsx]

## Sheet: S37_common downregulated gene
Common elements in T1-T4 T2-T4 T3-T4 T13-T4 :
Ityp12258
Ityp00147
Ityp03320
Ityp12257
Ityp00415
Ityp00381
Ityp17242
Ityp16321
Ityp00900
Ityp04262
Ityp10126
Ityp04263
Ityp04595
Ityp22892
Ityp03615
Ityp12225
Ityp17842
Ityp00984
Ityp15629
Ityp01718
Ityp19956
Ityp12805
Ityp17238
Ityp12259
Ityp09025
Ityp04531
Ityp08886
Ityp13735
Ityp04711
Ityp08482
Ityp12144
Ityp01978
Ityp10111
Ityp04532
Ityp10112
Ityp12143
Ityp10532
Ityp01442
Ityp08887
Ityp15562
Ityp10604
Ityp10518
Ityp00486
Ityp04026
Ityp02922
Ityp19110
Ityp20905
Ityp04671
Ityp22100
Ityp04539
Ityp08322
Ityp03420
Ityp23910
Ityp22335
Ityp06210
Ityp18292
Ityp07933
Ityp00899
Ityp04815
Ityp16808
Ityp11177
Ityp10203
Ityp11360
Ityp20185
Ityp10122
Ityp02423
Ityp08545
Ityp21598
Ityp01536
Ityp10130
Ityp06119
Ityp10319
Ityp01717
Ityp02885
Ityp21094
Ityp02724
Ityp09093
Ityp09416
Ityp16994
Ityp13639
Ityp05098
Ityp04069
Ityp02720
Ityp12878
Ityp22212
Ityp06556
Ityp22539
Ityp03277
Ityp08678
Ityp02642
Ityp10120
Ityp14288
Ityp05246
Ityp09938
Ityp07052
Ityp16319
Ityp08590
Ityp21966
Ityp08577
Ityp13564
Ityp22308
Ityp09088
Ityp04676
Ityp09152
Ityp13719
Ityp00219
Ityp19464
Ityp10161
Ityp08290
Ityp01015
Ityp21891
Ityp07127
Ityp11901
Ityp09709
Ityp21115
Ityp07840
Ityp02416
Ityp09195
Ityp23519
Ityp16641
Ityp08091
Ityp01720
Ityp16310
Ityp16981
Ityp02664
Ityp09889
Ityp04707
Ityp11420
Ityp22273
Ityp08240
Ityp22742
Ityp21512
Ityp05026
Ityp19594
Ityp06736
Ityp02157
Ityp11900
Ityp02340
Ityp20512
Ityp15574
Ityp09903
Ityp03714
Ityp17872
Ityp16235
Ityp08136
Ityp06729
Ityp10611
Ityp18290
Ityp07276
Ityp15051
Ityp22075
Ityp23710
Ityp17780
Ityp15741
Ityp01637
Ityp13588
Ityp03713
Ityp04291
Ityp10158
Ityp13659
Ityp08900
Ityp03785
Ityp02105
Ityp02982
Ityp01309
Ityp15581
Ityp14156
Ityp08763
Ityp14145
Ityp15567
Ityp10377
Ityp20437
Ityp00487
Ityp04175
Ityp13792
Ityp14392
Ityp17727
Ityp15563
Ityp16025
Ityp05594
Ityp02561
Ityp11036
Ityp13641
Ityp07811
Ityp09845
Ityp05283
Ityp22523
Ityp01013
Ityp00493
Ityp10129
Ityp10610
Ityp01613
Ityp04706
Ityp12161
Ityp08898
Ityp18199
Ityp15656
Ityp09364
Ityp15849
Ityp03743
Ityp06892
Ityp23035
Ityp14897
Ityp17246
Ityp09433
Ityp17081
Ityp18758
Ityp01377
Ityp11260
Ityp14881
Ityp18376
Ityp04708
Ityp04713
Ityp02415
Ityp13094
Ityp17094
Ityp19951
Ityp18377
Ityp09425
Ityp22336
Ityp14758
Ityp17112
Ityp05892
Ityp04752
Ityp18109
Ityp07351
Ityp04673
Ityp06851
Ityp12120
Ityp22208
Ityp03765
Ityp12974
Ityp14845
Ityp02410
Ityp10635
Ityp06751
Ityp04012
Ityp03048
Ityp10337
Ityp16748
Ityp01557
Ityp02875
Ityp18102
Ityp05330
Ityp12893
Ityp09838
Ityp10152
Ityp13228
Ityp11227
Ityp02737
Ityp03034
Ityp01128
Ityp04678
Ityp18717
Ityp06758
Ityp12500
Ityp01848
Ityp18412
Ityp23857
Ityp19646
Ityp13217
Ityp06057
Ityp15404
Ityp06972
Ityp03891
Ityp18805
Ityp01636
Ityp13956
Ityp11695
Ityp04483
Ityp08060
Ityp15825
Ityp06104
Ityp13721
Ityp22092
Ityp02003
Ityp12826
Ityp14953
Ityp10769
Ityp03435
Ityp03098
Ityp04205
Ityp11040
Ityp00494
Ityp03268
Ityp17180
Ityp21294
Ityp00780
Ityp18808
Ityp13114
Ityp07026
Ityp00617
Ityp09662
Ityp16652
Ityp03641
Ityp10338
Ityp12110
Ityp11519
Ityp14548
Ityp21918
Ityp03679
Ityp04275
Ityp05082
Ityp02669
Ityp18167
Ityp00657
Ityp23625
Ityp15767
Ityp15323
Ityp11093
Ityp04918
Ityp20548
Ityp20274
Ityp02808
Ityp01910
Ityp15512
Ityp19795
Ityp05300
Ityp00944
Ityp08956
Ityp12811
Ityp16137
Ityp18454
Ityp14018
Ityp14306
Ityp05263
Ityp21315
Ityp04751
Ityp04249
Ityp15309
Ityp02554
Ityp03575
Ityp14809
Ityp04694
Ityp11571
Ityp19339
Ityp02557
Ityp10202
Ityp10303
Ityp09240
Ityp05693
Ityp03394
Ityp03539
Ityp09175
Ityp07925
Ityp00828
Ityp03057
Ityp04655
Ityp17818
Ityp11894
Ityp08201
Ityp03335
Ityp03116
Ityp04726
Ityp01893
Ityp01603
Ityp16689
Ityp12497
Ityp03855
Ityp01986
Ityp06244
Ityp04886
Ityp09572
Ityp06549
Ityp06759
Ityp12817
Ityp08597
Ityp12647
Ityp09162
Ityp23523
Ityp13077
Ityp22202
Ityp19159
Ityp06257
Ityp08896
Ityp12195
Ityp22524
Ityp08916
Ityp04226
Ityp04816
Ityp19528
Ityp08962
Ityp06221
Ityp23131
Ityp12561
Ityp04387
Ityp08268
Ityp10754
Ityp02059
Ityp21179
Ityp06311
Ityp04654
Ityp07813
Ityp18470
Ityp09186
Ityp02417
Ityp11766
Ityp03667
Ityp13890
Ityp07775
Ityp22357
Ityp14217
Ityp22183
Ityp04252
Ityp20069
Ityp09788
Ityp15262
Ityp03470
Ityp14100
Ityp23278
Ityp17382
Ityp03872
Ityp01316
Ityp05417
Ityp01422
Ityp01537
Ityp10747
Ityp02821
Ityp09276
Ityp07487
Ityp14832
Ityp17095
Ityp07066
Ityp15737
Ityp12335
Ityp02956
Ityp00848
Ityp03786
Ityp23805
Ityp10379
Ityp18449
Ityp17392
Ityp02738
Ityp04715
Ityp17105
Ityp22921
Ityp10634
Ityp11439
Ityp00605
Ityp03753
Ityp15841
Ityp03495
Ityp16317
Ityp01584
Ityp20679
Ityp11392
Ityp15941
Ityp08350
Ityp17993
Ityp09438
Ityp23366
Ityp18045
Ityp06135
Ityp19137
Ityp00995
Ityp13821
Ityp04204
Ityp02169
Ityp00716
Ityp12355
Ityp15299
Ityp12810
Ityp02727
Ityp07548
Ityp08478
Ityp12337
Ityp08470
Ityp10601
Ityp14527
Ityp06249
Ityp19624
Ityp22152
Ityp05247
Ityp18786
Ityp09104
Ityp13761
Ityp13260
Ityp12145
Ityp12178
Ityp21307
Ityp10002
Ityp11568
Ityp15884
Ityp20536
Ityp14699
Ityp14231
Ityp06103
Ityp14003
Ityp20909
Ityp08600
Ityp18534
Ityp09170
Ityp07431
Ityp06633
Ityp07252
Ityp03730
Ityp04909
Ityp08368
Ityp14104
Ityp15054
Ityp00060
Ityp15601
Ityp12043
Ityp01598
Ityp10125
Ityp04679
Ityp01253
Ityp06385
Ityp17271
Ityp10123
Ityp08543
Ityp03626
Ityp17383
Ityp01746
Ityp07553
Ityp03665
Ityp10138
Ityp04206
Ityp11465
Ityp06138
Ityp07685
Ityp15745
Ityp03427
Ityp07646
Ityp14369
Ityp12109
Ityp06621
Ityp15834
Ityp00693
Ityp09856
Ityp05755
Ityp11590
Ityp17082
Ityp15732
Ityp13252
Ityp11058
Ityp16817
Ityp01056
Ityp04564
Ityp10428
Ityp02913
Ityp11713
Ityp08137
Ityp17314
Ityp09275
Ityp18435
Ityp03640
Ityp14955
Ityp07754
Ityp12996
Ityp15081
Ityp06043
Ityp00301
Ityp08897
Ityp04740
Ityp07344
Ityp19862
Ityp03632
Ityp16458
Ityp05155
Ityp10881
Ityp05423
Ityp20517
Ityp15971
Ityp05372
Ityp09513
Ityp02948
Ityp09607
Ityp03387
Ityp06277
Ityp13034
Ityp10480
Ityp03260
Ityp12280
Ityp09992
Ityp10372
Ityp12490
Ityp15332
Ityp00483
Ityp14954
Ityp07831
Ityp20273
Ityp11307
Ityp07645
Ityp06982
Ityp00824
Ityp03416
Ityp16895
Ityp03863
Ityp09426
Ityp10166
Ityp20971
Ityp02257
Ityp10385
Ityp02756
Ityp21924
Ityp06942
Ityp10236
Ityp07978
Ityp02673
Ityp17133
Ityp14811
Ityp14393
Ityp06205
Ityp03276
Ityp08003
Ityp18082
Ityp02366
Ityp07682
Ityp14528
Ityp21040
Ityp05706
Ityp17418
Ityp08039
Ityp03241
Ityp11788
Ityp14721
Ityp10356
Ityp13225
Ityp14119
Ityp08024
Ityp15102
Ityp08842
Ityp08572
Ityp17187
Ityp02955
Ityp16444
Ityp01634
Ityp01395
Ityp07862
Ityp01556
Ityp14507
Ityp00915
Ityp01506
Ityp12483
Ityp01660
Ityp11740
Ityp03297
Ityp05202
Ityp06743
Ityp11207
Ityp12790
Ityp04160
Ityp12199
Ityp14536
Ityp22184
Ityp01476
Ityp09766
Ityp15142
Ityp04503
Ityp16290
Ityp08671
Ityp17020
Ityp12170
Ityp14315
Ityp03660
Ityp01573
Ityp13158
Ityp00772
Ityp17819
Ityp09955
Ityp00606
Ityp09976
Ityp03405
Ityp03411
Ityp10677
Ityp17209
Ityp04540
Ityp02698
Ityp10025
Ityp06861
Ityp11361
Ityp23829
Ityp12590
Ityp13311
Ityp11599
Ityp19487
Ityp03562
Ityp15511
Ityp09869
Ityp09970
Ityp07006
Ityp03413
Ityp02454
Ityp01732
Ityp05177
Ityp01151
Ityp05262
Ityp09909
Ityp15887
Ityp21950
Ityp07620
Ityp03623
Ityp00588
Ityp09846
Ityp08071
Ityp10373
Ityp22264
Ityp10432
Ityp11471
Ityp10863
Ityp12440
Ityp03880
Ityp11951
Ityp14230
Ityp15126
Ityp12765
Ityp05040
Ityp17053
Ityp11181
Ityp03703
Ityp00636
Ityp13308
Ityp20916
Ityp06002
Ityp04339
Ityp14091
Ityp12422
Ityp10744
Ityp05847
Ityp08805
Ityp12569
Ityp20729
Ityp09975
Ityp09716
Ityp09926
Ityp12102
Ityp04198
Ityp02960
Ityp19740
Ityp03710
Ityp08183
Ityp05573
Ityp20975
Ityp01604
Ityp09185
Ityp03819
Ityp06178
Ityp15303
Ityp12989
Ityp12410
Ityp12300
Ityp08875
Ityp06806
Ityp08212
Ityp17206
Ityp02929
Ityp10374
Ityp22408
Ityp08447
Ityp02865
Ityp09831
Ityp05843
Ityp18469
Ityp10628
Ityp17098
Ityp11893
Ityp15928
Ityp17330
Ityp14535
Ityp11331
Ityp09979
Ityp06337
Ityp09278
Ityp15600
Ityp09454
Ityp17260
Ityp04458
Ityp08135
Ityp12496
Ityp10057
Ityp13110
Ityp00959
Ityp11996
Ityp01168
Ityp14413
Ityp08580
Ityp09044
Ityp04896
Ityp19267
Ityp12533
Ityp17096
Ityp07643
Ityp00667
Ityp15955
Ityp15914
Ityp01831
Ityp13016
Ityp05809
Ityp12218
Ityp04323
Ityp17773
Ityp08615
Ityp11848
Ityp09141
Ityp01597
Ityp11890
Ityp10441
Ityp14417
Ityp11210
Ityp15219
Ityp17315
Ityp01981
Ityp14614
Ityp03172
Ityp04180
Ityp08460
Ityp12698
Ityp14689
Ityp07175
Ityp06199
Ityp22756
Ityp00945
Ityp21081
Ityp04586
Ityp11094
Ityp12969
Ityp11464
Ityp05087
Ityp11816
Ityp10147
Ityp03594
Ityp17748
Ityp05727
Ityp10409
Ityp01362
Ityp12584
Ityp08642
Ityp18316
Ityp12656
Ityp14096
Ityp12096
Ityp15136
Ityp15055
Ityp06276
Ityp06919
Ityp16301
Ityp03839
Ityp09280
Ityp09268
Ityp10913
Ityp03021
Ityp17218
Ityp01620
Ityp08809
Ityp15859
Ityp05150
Ityp05748
Ityp09793
Ityp10672
Ityp17562
Ityp13297
Ityp00362
Ityp17122
Ityp09451
Ityp09918
Ityp04455
Ityp03064
Ityp15316
Ityp01872
Ityp15252
Ityp03724
Ityp12221
Ityp11620
Ityp18709
Ityp00728
Ityp03739
Ityp15801
Ityp07844
Ityp14939
Ityp12256
Ityp08302
Ityp10660
Ityp20529
Ityp05127
Ityp03861
Ityp09748
Ityp03879
Ityp02686
Ityp12042
Ityp15776
Ityp06971
Ityp12071
Ityp01412
Ityp19765
Ityp17141
Ityp03378
Ityp15879
Ityp07865
Ityp08749
Ityp00644
Ityp04755
Ityp11749
Ityp01791
Ityp05862
Ityp02714
Ityp21931
Ityp21102
Ityp05988
Ityp05114
Ityp05648
Ityp13414
Ityp07945
Ityp02954
Ityp05614
Ityp11702
Ityp03499
Ityp17952
Ityp13179
Ityp17425
Ityp12136
Ityp09437
Ityp00495
Ityp15135
Ityp09269
Ityp06552
Ityp03926
Ityp12392
Ityp03063
Ityp07472
Ityp05702
Ityp05953
Ityp16966
Ityp19127
Ityp09279
Ityp11786
Ityp08344
Ityp05513
Ityp09999
Ityp00507
Ityp13284
Ityp03208
Ityp10802
Ityp15162
Ityp01475
Ityp21059
Ityp07993
Ityp05955
Ityp05821
Ityp02083
Ityp02740
Ityp16453
Ityp04596
Ityp14152
Ityp03360
Ityp21084
Ityp06568
Ityp12778
Ityp11257
Ityp09927
Ityp07644
Ityp02114
Ityp05791
Ityp11024
Ityp14931
Ityp08015
Ityp00604
Ityp00678
Ityp07520
Ityp17349
Ityp04276
Ityp05156
Ityp14682
Ityp05288
Ityp03306
Ityp04656
Ityp17423
Ityp15959
Ityp01359
Ityp22465
Ityp09754
Ityp15221
Ityp04351
Ityp00192
Ityp14737
Ityp03170
Ityp22310
Ityp03906
Ityp03655
Ityp19424
Ityp15331
Ityp01298
Ityp17811
Ityp17985
Ityp15208
Ityp16910
Ityp15612
Ityp17174
Ityp01042
Ityp13230
Ityp07165
Ityp07619
Ityp20270
Ityp04634
Ityp10804
Ityp09896
Ityp11658
Ityp03884
Ityp08436
Ityp11906
Ityp06380
Ityp01247
Ityp12467
Ityp00418
Ityp23456
Ityp10488
Ityp08002
Ityp02349
Ityp04587
Ityp05629
Ityp15881
Ityp14247
Ityp06963
Ityp18692
Ityp16915
Ityp09305
Ityp16389
Ityp02162
Ityp06964
Ityp14090
Ityp14354
Ityp10215
Ityp17378
Ityp02457
Ityp07577
Ityp02483
Ityp03934
Ityp05782
Ityp00552
Ityp07514
Ityp05365
Ityp14501
Ityp08770
Ityp14570
Ityp05615
Ityp11373
Ityp01408
Ityp05088
Ityp04571
Ityp14373
Ityp10242
Ityp03512
Ityp10730
Ityp11482
Ityp15310
Ityp09905
Ityp08260
Ityp07247
Ityp13795
Ityp00052
Ityp22181
Ityp01108
Ityp03407
Ityp04761
Ityp00643
Ityp16934
Ityp02674
Ityp12296
Ityp05015
Ityp07914

## Sheet: S37_T1-T4 specific
Elements only in T1-T4 :
Ityp05778
Ityp18324
Ityp05779
Ityp18689
Ityp22942
Ityp16026
Ityp08042
Ityp17843
Ityp08013
Ityp15350
Ityp04970
Ityp19589
Ityp07591
Ityp06086
Ityp18325
Ityp05909
Ityp14515
Ityp06878
Ityp15265
Ityp04956
Ityp02904
Ityp23459
Ityp13070
Ityp08654
Ityp15311
Ityp11412
Ityp07554
Ityp19775
Ityp08067
Ityp02817
Ityp19820
Ityp03894
Ityp18570
Ityp08427
Ityp00454
Ityp09801
Ityp18530
Ityp12515
Ityp04329
Ityp19720
Ityp10340
Ityp07087
Ityp07040
Ityp08167
Ityp10898
Ityp11236
Ityp15882
Ityp09230
Ityp09617
Ityp07461
Ityp03731
Ityp02397
Ityp07764
Ityp18052
Ityp12127
Ityp09118
Ityp02749
Ityp11820
Ityp12242
Ityp01324
Ityp17390
Ityp00347
Ityp04396
Ityp14422
Ityp03104
Ityp16922
Ityp22473
Ityp06432
Ityp08047
Ityp18059
Ityp12993
Ityp08738
Ityp10344
Ityp08052
Ityp03549
Ityp04877
Ityp22045
Ityp02268
Ityp14005
Ityp05882
Ityp00383
Ityp04138
Ityp11720
Ityp15715
Ityp19625
Ityp08485
Ityp01970
Ityp17444
Ityp04260
Ityp05213
Ityp09753
Ityp08049
Ityp00733
Ityp09718
Ityp21942
Ityp05401
Ityp07641
Ityp13079
Ityp02652
Ityp09319
Ityp01770
Ityp12193
Ityp07670
Ityp09223
Ityp18005
Ityp06431
Ityp02132
Ityp17149
Ityp02342
Ityp04398
Ityp10906
Ityp08864
Ityp02625
Ityp18074
Ityp22199
Ityp02667
Ityp00005
Ityp08064
Ityp05182
Ityp01990
Ityp01076
Ityp16911
Ityp18039
Ityp06620
Ityp06236
Ityp21758
Ityp23856
Ityp04140
Ityp09969
Ityp03899
Ityp15526
Ityp01115
Ityp04386
Ityp03484
Ityp11715
Ityp03215
Ityp13059
Ityp11410
Ityp18044
Ityp11828
Ityp01441
Ityp06109
Ityp07063
Ityp01005
Ityp00713
Ityp01306
Ityp01089
Ityp00411
Ityp10888
Ityp03252
Ityp03608
Ityp07953
Ityp02325
Ityp14655
Ityp00709
Ityp14580
Ityp05957
Ityp06659
Ityp08055
Ityp06384
Ityp06154
Ityp13381
Ityp02874
Ityp12263
Ityp13160
Ityp05883
Ityp12660
Ityp11840
Ityp03758
Ityp04675
Ityp09968
Ityp02766
Ityp08876
Ityp02096
Ityp09254
Ityp14353
Ityp05908
Ityp13008
Ityp08950
Ityp07951
Ityp01873
Ityp05208
Ityp09830
Ityp00264
Ityp08538
Ityp13419
Ityp11579
Ityp10998
Ityp06310
Ityp17214
Ityp07628
Ityp00492
Ityp17100
Ityp11343
Ityp10278
Ityp08319
Ityp11984
Ityp17363
Ityp08377
Ityp12649
Ityp12451
Ityp04921
Ityp22444
Ityp06136
Ityp08757
Ityp17190
Ityp01212
Ityp05112
Ityp06288
Ityp00431
Ityp10566
Ityp08659
Ityp04625
Ityp17404
Ityp09723
Ityp08652
Ityp00142
Ityp08356
Ityp11328
Ityp04922
Ityp07141
Ityp23462
Ityp11811
Ityp02341
Ityp04135
Ityp09807
Ityp12248
Ityp05867
Ityp19444
Ityp07904
Ityp04610
Ityp13032
Ityp02346
Ityp04824
Ityp08105
Ityp09234
Ityp03867
Ityp12425
Ityp01126
Ityp09824
Ityp01263
Ityp00176
Ityp10397
Ityp18367
Ityp13856
Ityp03964
Ityp13231
Ityp01828
Ityp02503
Ityp00769
Ityp12899
Ityp19648
Ityp09299
Ityp04094
Ityp05710
Ityp12603
Ityp04505
Ityp12056
Ityp04335
Ityp03353
Ityp07713
Ityp18662
Ityp09080
Ityp05600
Ityp01710
Ityp13382
Ityp14188
Ityp01969
Ityp05664
Ityp08741
Ityp08852
Ityp10856
Ityp22344
Ityp15670
Ityp06933
Ityp13038
Ityp01401
Ityp04441
Ityp08074
Ityp12565
Ityp05714
Ityp10571
Ityp21915
Ityp21702
Ityp09089
Ityp14063
Ityp04784
Ityp01430
Ityp05580
Ityp15341
Ityp07185
Ityp01585
Ityp18661
Ityp00781
Ityp09253
Ityp08669
Ityp06535
Ityp14452
Ityp05008
Ityp10484
Ityp00384
Ityp09843
Ityp17156
Ityp12427
Ityp11434
Ityp12846
Ityp11598
Ityp11252
Ityp17970
Ityp14238
Ityp14613
Ityp06525
Ityp07551
Ityp07137
Ityp09818
Ityp09794
Ityp09056
Ityp03374
Ityp03423
Ityp08291
Ityp13781
Ityp14352
Ityp10622
Ityp08349
Ityp03425
Ityp01748
Ityp15150
Ityp11433
Ityp00478
Ityp02687
Ityp14695
Ityp02606
Ityp13384
Ityp10052
Ityp12580
Ityp02838
Ityp13134
Ityp18392
Ityp08862
Ityp06639
Ityp16946

## Sheet: S37_T2-T4 specific
Elements only in T2-T4 :
Ityp14797
Ityp20913
Ityp09295
Ityp12558
Ityp15225
Ityp02646
Ityp03727
Ityp04171
Ityp12777
Ityp07837
Ityp01794
Ityp08764
Ityp04451
Ityp06129
Ityp14303
Ityp08006
Ityp10496
Ityp03381
Ityp03165
Ityp01811
Ityp15618
Ityp04939
Ityp14937
Ityp11852
Ityp01490
Ityp23333
Ityp03676
Ityp01391
Ityp09957
Ityp00498
Ityp04693
Ityp11362
Ityp00118
Ityp21080
Ityp07111
Ityp06644
Ityp08988
Ityp05535
Ityp08688
Ityp03810
Ityp05421
Ityp07305
Ityp00341
Ityp13078
Ityp05157
Ityp12235
Ityp00761
Ityp21559
Ityp00666
Ityp06966
Ityp03751
Ityp17069
Ityp03284
Ityp11851
Ityp12021
Ityp05713
Ityp00554
Ityp04823
Ityp09847
Ityp17805
Ityp17419
Ityp00867
Ityp13443
Ityp10328
Ityp03471
Ityp11699
Ityp00562
Ityp04498
Ityp07010
Ityp18034
Ityp01994
Ityp13017
Ityp02925
Ityp13175
Ityp13592
Ityp14657
Ityp04809
Ityp01810
Ityp06580
Ityp04436
Ityp04445
Ityp01183
Ityp02049
Ityp21071
Ityp21567
Ityp10204
Ityp06021
Ityp17168
Ityp10413
Ityp04867
Ityp07229
Ityp02359
Ityp10597
Ityp08703
Ityp15268
Ityp07323
Ityp00760
Ityp08963
Ityp15827
Ityp07569
Ityp17117
Ityp16867
Ityp16313
Ityp07593
Ityp11072
Ityp11191
Ityp18387
Ityp14209
Ityp13204
Ityp13376
Ityp01819
Ityp02502
Ityp02552
Ityp03066
Ityp06085
Ityp15110
Ityp21900
Ityp10431
Ityp13642
Ityp00400
Ityp21237
Ityp08786
Ityp12030
Ityp06007
Ityp01425
Ityp17901
Ityp00167
Ityp10020
Ityp14532
Ityp21096
Ityp01379
Ityp13969
Ityp13250
Ityp12525
Ityp00464
Ityp22442
Ityp09176
Ityp16322
Ityp09227
Ityp04385
Ityp22543
Ityp15625
Ityp15954
Ityp08740
Ityp17285
Ityp15816
Ityp08073
Ityp01673
Ityp12477
Ityp05698
Ityp04036
Ityp00756
Ityp12291
Ityp12227
Ityp12505
Ityp03585
Ityp00278
Ityp03100
Ityp02505
Ityp16826
Ityp05659
Ityp11270
Ityp02733
Ityp10145
Ityp15245
Ityp07639
Ityp13832
Ityp08649
Ityp14670
Ityp15758
Ityp11523
Ityp12397
Ityp11528
Ityp10150
Ityp01829
Ityp02292
Ityp18379
Ityp01095
Ityp17150
Ityp15893
Ityp13937
Ityp21012
Ityp08532
Ityp02548
Ityp06145
Ityp00444
Ityp19911
Ityp12412
Ityp00896
Ityp04237
Ityp06162
Ityp05538
Ityp03586
Ityp13936
Ityp03779
Ityp11698
Ityp05734
Ityp08851
Ityp09467
Ityp13058
Ityp13030
Ityp09844
Ityp01262
Ityp09713
Ityp13165
Ityp04349
Ityp17159
Ityp09823
Ityp11344
Ityp07902
Ityp13340
Ityp04669
Ityp02343
Ityp08364
Ityp13396
Ityp08394
Ityp01288
Ityp06280
Ityp06211
Ityp23284
Ityp16939
Ityp07376
Ityp11414
Ityp14735
Ityp21463
Ityp15968
Ityp13634
Ityp03571
Ityp15779
Ityp12978
Ityp11536
Ityp13336
Ityp06255
Ityp23780
Ityp08242
Ityp03263
Ityp17393
Ityp12028
Ityp04199
Ityp13326
Ityp01264
Ityp06564
Ityp13320
Ityp01993
Ityp20628
Ityp10919
Ityp05790
Ityp10644
Ityp01419
Ityp16182
Ityp11413
Ityp00279
Ityp06619
Ityp13014
Ityp04832
Ityp10908
Ityp21907
Ityp01285
Ityp13579
Ityp10866
Ityp03729
Ityp03216
Ityp01698
Ityp05833
Ityp03318
Ityp02443
Ityp02583
Ityp15174
Ityp15878
Ityp08904
Ityp10443
Ityp12190
Ityp15838
Ityp18414
Ityp14960
Ityp11539
Ityp19011
Ityp15692
Ityp11026
Ityp17939
Ityp13805
Ityp01432
Ityp12129
Ityp17687
Ityp21236
Ityp06214
Ityp14778
Ityp06181
Ityp02883
Ityp14346
Ityp09724
Ityp06841
Ityp12343
Ityp19647
Ityp23931
Ityp06857
Ityp13438
Ityp00560
Ityp11879
Ityp17862
Ityp12363
Ityp08613
Ityp16848
Ityp13976
Ityp13357
Ityp08416
Ityp16949
Ityp05496
Ityp08973
Ityp07736
Ityp14610
Ityp18278
Ityp10848
Ityp17900
Ityp15845
Ityp23001
Ityp03489
Ityp05274
Ityp00291
Ityp05051
Ityp16237
Ityp08531
Ityp06647
Ityp09663
Ityp15028
Ityp12470
Ityp10008
Ityp02886
Ityp15952
Ityp06508
Ityp14688
Ityp07358
Ityp09357
Ityp11546
Ityp15615
Ityp08142
Ityp17417
Ityp13048
Ityp09440
Ityp16814
Ityp00664
Ityp22106
Ityp08263
Ityp22157
Ityp19252
Ityp05354
Ityp14907
Ityp22554
Ityp11955
Ityp15619
Ityp02453
Ityp18443
Ityp06565
Ityp01839
Ityp16309
Ityp09672
Ityp12872
Ityp13541
Ityp01941
Ityp12229
Ityp19094
Ityp04920
Ityp17432
Ityp09483
Ityp07101
Ityp00544
Ityp03587
Ityp14865
Ityp04887
Ityp04659
Ityp19104
Ityp03307
Ityp08846
Ityp05429
Ityp23886
Ityp06555
Ityp06127
Ityp00868
Ityp04501
Ityp09778
Ityp01258
Ityp00022
Ityp06587
Ityp03180
Ityp17384
Ityp12142
Ityp05977
Ityp13481
Ityp02206
Ityp00512
Ityp15545
Ityp03370
Ityp09920
Ityp04998
Ityp00371
Ityp08261
Ityp09783
Ityp02078
Ityp07532
Ityp19705
Ityp12940
Ityp16067
Ityp07886
Ityp04599
Ityp15298
Ityp11918
Ityp11917
Ityp10578
Ityp13535
Ityp16291
Ityp13711
Ityp00256
Ityp13868
Ityp13157
Ityp05460
Ityp18380
Ityp20281
Ityp05579
Ityp17025
Ityp15210
Ityp07124
Ityp21862
Ityp20019
Ityp23930
Ityp00694
Ityp23510
Ityp05404
Ityp23848
Ityp12959
Ityp17875
Ityp16765
Ityp02155
Ityp21340
Ityp21432
Ityp04967
Ityp07537
Ityp18829
Ityp19204
Ityp10900
Ityp00437
Ityp11742
Ityp03332
Ityp17938
Ityp05039
Ityp16909
Ityp22255
Ityp05501
Ityp11193
Ityp22207
Ityp01805
Ityp05976
Ityp08558
Ityp06448
Ityp19973
Ityp03492
Ityp17998
Ityp10763
Ityp10027
Ityp19964
Ityp15044
Ityp13096
Ityp04738
Ityp07478
Ityp02816
Ityp20020
Ityp11033
Ityp16779
Ityp07767
Ityp05306
Ityp19145
Ityp22024
Ityp08833
Ityp17935
Ityp11682
Ityp23026
Ityp12045
Ityp14913
Ityp09439
Ityp10167
Ityp08959
Ityp07942
Ityp07709

## Sheet: S37_T3-T4 specific
Elements only in T3-T4 :
Ityp14311
Ityp14314
Ityp14312
Ityp17369
Ityp10032
Ityp15746
Ityp05506
Ityp08614
Ityp22645
Ityp13675
Ityp23932
Ityp15494
Ityp05281
Ityp17621
Ityp12855
Ityp04592
Ityp04215
Ityp17461
Ityp14310
Ityp16957
Ityp19335
Ityp22793
Ityp18748
Ityp22104
Ityp07721
Ityp14618
Ityp02908
Ityp06250
Ityp21336
Ityp04250
Ityp09296
Ityp23244
Ityp16662
Ityp23921
Ityp06514
Ityp21701
Ityp16762
Ityp16144
Ityp22517
Ityp10729
Ityp22008
Ityp08552
Ityp03794
Ityp06794
Ityp10031
Ityp01913
Ityp20348
Ityp02691
Ityp12906
Ityp17767
Ityp16945
Ityp14940
Ityp10396
Ityp11180
Ityp12360
Ityp15490
Ityp18165
Ityp00088
Ityp12437
Ityp19596
Ityp13334
Ityp15705
Ityp04391
Ityp02356
Ityp14139
Ityp15622
Ityp08096
Ityp18514
Ityp05584
Ityp02307
Ityp02245
Ityp10727
Ityp18620
Ityp03274
Ityp10967
Ityp18065
Ityp06649
Ityp16473
Ityp07093
Ityp13827
Ityp11099
Ityp01663
Ityp15654
Ityp22627
Ityp11185
Ityp21083
Ityp11206
Ityp17822
Ityp10473
Ityp07538
Ityp06203
Ityp18267
Ityp22261
Ityp00074
Ityp14180
Ityp20408
Ityp01162
Ityp01544
Ityp21519
Ityp13557
Ityp20021
Ityp12124
Ityp13605
Ityp09978
Ityp05681
Ityp08228
Ityp04641
Ityp11582
Ityp21354
Ityp03544
Ityp22078
Ityp05815
Ityp11466
Ityp00119
Ityp13714
Ityp16953
Ityp23834
Ityp15906
Ityp09212
Ityp06090
Ityp13064
Ityp06922
Ityp20199
Ityp14289
Ityp07640
Ityp18099
Ityp17119
Ityp10019
Ityp00903
Ityp01948
Ityp06281
Ityp06586
Ityp02482
Ityp06917
Ityp05789
Ityp01957
Ityp13066
Ityp17763
Ityp14581
Ityp14255
Ityp11238
Ityp11183
Ityp17189
Ityp22425
Ityp09100
Ityp07182
Ityp06656
Ityp17971
Ityp01949
Ityp02789
Ityp21442
Ityp02446
Ityp06918
Ityp22200
Ityp21457
Ityp01686
Ityp02254
Ityp10017
Ityp10153
Ityp17004
Ityp16483
Ityp09722
Ityp04979
Ityp07088
Ityp03313
Ityp06904
Ityp09885
Ityp08536
Ityp04479
Ityp18129
Ityp00842
Ityp03716
Ityp00586
Ityp10903
Ityp06091
Ityp09756
Ityp07688
Ityp00305
Ityp11597
Ityp12555
Ityp01702
Ityp04375
Ityp10562
Ityp21971
Ityp10648
Ityp11121
Ityp11774
Ityp00429
Ityp06925
Ityp21732
Ityp04762
Ityp20255
Ityp08432
Ityp13366
Ityp17253
Ityp07467
Ityp12944
Ityp12260
Ityp11476
Ityp13365
Ityp22187
Ityp04734
Ityp14893
Ityp03000
Ityp22060
Ityp15891
Ityp17199
Ityp12306
Ityp01470
Ityp00349
Ityp12454
Ityp03908
Ityp13237
Ityp01629
Ityp00555
Ityp12860
Ityp12138
Ityp18293
Ityp04550
Ityp20350
Ityp06222
Ityp00783
Ityp11525
Ityp13163
Ityp02488
Ityp01708
Ityp14319
Ityp12395
Ityp14627
Ityp01478
Ityp07689
Ityp11223
Ityp16196
Ityp22132
Ityp01705
Ityp14137
Ityp09293
Ityp14990
Ityp11374
Ityp13185
Ityp05193
Ityp16288
Ityp09039
Ityp14860
Ityp06763
Ityp14473
Ityp23844
Ityp06301
Ityp15147
Ityp01513
Ityp01166
Ityp12310
Ityp11865
Ityp10055
Ityp14774
Ityp06010
Ityp16985
Ityp08668
Ityp15680
Ityp12851
Ityp11837
Ityp12417
Ityp09289
Ityp00774
Ityp13072
Ityp15024
Ityp10993
Ityp00742
Ityp09544
Ityp02784
Ityp07690
Ityp14085
Ityp21047
Ityp14481
Ityp18690
Ityp12536
Ityp18002
Ityp07193
Ityp12430
Ityp08696
Ityp01500
Ityp13885
Ityp17968
Ityp11509
Ityp13065
Ityp10015
Ityp05586
Ityp17264
Ityp11808
Ityp11892
Ityp02190
Ityp05363
Ityp12642
Ityp03678
Ityp02995
Ityp09329
Ityp00953
Ityp20887
Ityp02747
Ityp13858
Ityp17290
Ityp04292
Ityp02645
Ityp10191
Ityp12201
Ityp12614
Ityp17127
Ityp03648
Ityp11614
Ityp08033
Ityp14734
Ityp17140
Ityp00449
Ityp00931
Ityp22420
Ityp05783
Ityp12547
Ityp17995
Ityp14386
Ityp14245
Ityp09147
Ityp14447
Ityp07102
Ityp17340
Ityp03194
Ityp02084
Ityp23593
Ityp12297
Ityp09356
Ityp04314
Ityp08878
Ityp16350
Ityp08751
Ityp15151
Ityp14641
Ityp10709
Ityp18072
Ityp10736
Ityp03993
Ityp08293
Ityp10574
Ityp14790
Ityp05206
Ityp04334
Ityp10738
Ityp22066
Ityp04068
Ityp17897
Ityp00872
Ityp09714
Ityp08076
Ityp05109
Ityp17353
Ityp02994
Ityp02775
Ityp12114
Ityp02009
Ityp00406
Ityp04369
Ityp10564
Ityp11576
Ityp09294
Ityp19431
Ityp10871
Ityp09445
Ityp01559
Ityp23076
Ityp03803
Ityp08681
Ityp10755
Ityp13212
Ityp02831
Ityp10799
Ityp00609
Ityp00020
Ityp14321
Ityp07144
Ityp15809
Ityp08873
Ityp00103
Ityp09715
Ityp00812
Ityp11897
Ityp09328
Ityp00653
Ityp03865
Ityp14628
Ityp08207
Ityp14084
Ityp17364
Ityp11316
Ityp14192
Ityp14438
Ityp10981
Ityp12987
Ityp01768
Ityp17291
Ityp13206
Ityp10326
Ityp05814
Ityp18440
Ityp06094
Ityp15337
Ityp07000
Ityp08932
Ityp14724
Ityp10700
Ityp11263
Ityp04020
Ityp08328
Ityp13280
Ityp14214
Ityp06661
Ityp14508
Ityp19792
Ityp12643
Ityp03897

## Sheet: S37_T13-T4 specific
Elements only in T13-T4 :
Ityp07778
Ityp10101
Ityp17237
Ityp15241
Ityp10607
Ityp07930
Ityp12875
Ityp14258
Ityp19489
Ityp10516
Ityp07937
Ityp13275
Ityp22023
Ityp01891
Ityp01874
Ityp11255
Ityp19426
Ityp09164
Ityp17274
Ityp06200
Ityp08204
Ityp18280
Ityp04475
Ityp14257
Ityp22006
Ityp06229
Ityp11341
Ityp21550
Ityp15270
Ityp23881
Ityp16302
Ityp00701
Ityp17240
Ityp01715
Ityp09174
Ityp07077
Ityp10514
Ityp05769
Ityp06534
Ityp16307
Ityp09727
Ityp00904
Ityp13586
Ityp10688
Ityp02197
Ityp06095
Ityp01433
Ityp20958
Ityp10102
Ityp00696
Ityp17034
Ityp21770
Ityp02275
Ityp03342
Ityp02427
Ityp01886
Ityp19834
Ityp16106
Ityp09925
Ityp10569
Ityp13750
Ityp07411
Ityp09872
Ityp05878
Ityp17733
Ityp09277
Ityp23361
Ityp23318
Ityp05630
Ityp07940
Ityp00515
Ityp19832
Ityp07665
Ityp22195
Ityp07938
Ityp03025
Ityp22889
Ityp17273
Ityp22692
Ityp20030
Ityp01622
Ityp23027
Ityp02648
Ityp18645
Ityp07935
Ityp00734
Ityp17239
Ityp18255
Ityp07843
Ityp06422
Ityp16614
Ityp04477
Ityp18680
Ityp15171
Ityp18016
Ityp11748
Ityp02035
Ityp13368
Ityp12277
Ityp23567
Ityp03741
Ityp09249
Ityp16960
Ityp03345
Ityp18351
Ityp13533
Ityp09588
Ityp18364
Ityp05266
Ityp07963
Ityp16773
Ityp06062
Ityp16965
Ityp15540
Ityp05602
Ityp16580
Ityp22603
Ityp09726
Ityp20930
Ityp13566
Ityp00826
Ityp01594
Ityp09984
Ityp17021
Ityp20475
Ityp06907
Ityp06989
Ityp18489
Ityp23909
Ityp17617
Ityp11222
Ityp13520
Ityp13222
Ityp21551
Ityp14099
Ityp14864
Ityp06953
Ityp23577
Ityp14061
Ityp03109
Ityp21560
Ityp15684
Ityp12167
Ityp18344
Ityp21146
Ityp18992
Ityp13173
Ityp18567
Ityp14679
Ityp17633
Ityp06335
Ityp01176
Ityp23276
Ityp18420
Ityp06890
Ityp12786
Ityp08705
Ityp15244
Ityp13219
Ityp21729
Ityp14259
Ityp17058
Ityp22272
Ityp22237
Ityp11224
Ityp22484
Ityp02968
Ityp13268
Ityp22875
Ityp15664
Ityp19977
Ityp23022
Ityp21620
Ityp02941
Ityp05638
Ityp22656
Ityp12881
Ityp14300
Ityp16420
Ityp00410
Ityp17207
Ityp16402
Ityp05097
Ityp03547
Ityp14423
Ityp09933
Ityp11258
Ityp12288
Ityp15027
Ityp05426
Ityp16431
Ityp18371
Ityp14930
Ityp10454
Ityp01758
Ityp14900
Ityp12559
Ityp20115
Ityp13126
Ityp15787
Ityp18703
Ityp12081
Ityp19086
Ityp07607
Ityp15391
Ityp21472
Ityp03261
Ityp23028
Ityp17245
Ityp19288
Ityp20132
Ityp07964
Ityp10891
Ityp11868
Ityp19038
Ityp18704
Ityp13999
Ityp13645
Ityp11421
Ityp10238
Ityp17565
Ityp04432
Ityp08386
Ityp22427
Ityp16129
Ityp15616
Ityp13404
Ityp00402
Ityp03565
Ityp17282
Ityp17032
Ityp01921
Ityp03774
Ityp21223
Ityp00672
Ityp09465
Ityp15716
Ityp02753
Ityp06272
Ityp11287
Ityp01657
Ityp10450
Ityp05096
Ityp11761
Ityp02288
Ityp19674
Ityp07616
Ityp20337
Ityp17083
Ityp21364
Ityp00591
Ityp09966
Ityp14664
Ityp22077
Ityp13128
Ityp23879
Ityp16679
Ityp07167
Ityp04407
Ityp10722
Ityp13673
Ityp10902
Ityp04476
Ityp11987
Ityp17075
Ityp05481
Ityp10970
Ityp19680
Ityp20805
Ityp12220
Ityp02441
Ityp03804
Ityp06905
Ityp11342
Ityp10693
Ityp09913
Ityp18714
Ityp03797
Ityp12692
Ityp19762
Ityp02490
Ityp14080
Ityp13644
Ityp15141
Ityp07237
Ityp01413
Ityp00259
Ityp13770
Ityp20249
Ityp03082
Ityp08423
Ityp22938
Ityp13865
Ityp02287
Ityp04413
Ityp09932
Ityp04803
Ityp20688
Ityp08138
Ityp00967
Ityp23324
Ityp04277
Ityp04067
Ityp11753
Ityp12935
Ityp06279
Ityp18256
Ityp05780
Ityp07380
Ityp12160
Ityp17836
Ityp07796
Ityp04805
Ityp17389
Ityp12418
Ityp22050
Ityp08384
Ityp01220
Ityp17110
Ityp13055
Ityp14265
Ityp16417
Ityp14817
Ityp06270
Ityp11005
Ityp17080
Ityp01985
Ityp03285
Ityp09325
Ityp13053
Ityp20687
Ityp12550
Ityp14211
Ityp08249
Ityp12713
Ityp12556
Ityp22944
Ityp14578
Ityp04638
Ityp10491
Ityp10806
Ityp12520
Ityp07301
Ityp14612
Ityp00457
Ityp12274
Ityp08376
Ityp08894
Ityp20681
Ityp12117
Ityp12416
Ityp05351
Ityp22328
Ityp04408
Ityp21322
Ityp04557
Ityp10826
Ityp11733
Ityp04054
Ityp08304
Ityp11347
Ityp11909
Ityp17308
Ityp17490
Ityp12480
Ityp11006
Ityp14480
Ityp21069
Ityp12205
Ityp07019
Ityp08732
Ityp10787
Ityp09207
Ityp14260
Ityp09881
Ityp14275
Ityp01380
Ityp04346
Ityp13144
Ityp20670
Ityp08799
Ityp01737
Ityp20875
Ityp08193
Ityp14388
Ityp01077
Ityp20535
Ityp02439
Ityp17236
Ityp06113
Ityp08119
Ityp00345
Ityp07870
Ityp02877
Ityp13421
Ityp10945
Ityp14229
Ityp06268
Ityp22992
Ityp12695
Ityp09994
Ityp07629
Ityp10650
Ityp11974
Ityp15840
Ityp08365
Ityp11737
Ityp02317
Ityp09106
Ityp07981
Ityp07153
Ityp19655
Ityp07304
Ityp01371
Ityp04022
Ityp00027
Ityp04133
Ityp00620
Ityp14579
Ityp01394
Ityp14414
Ityp00711
Ityp02944
Ityp05661
Ityp10698

## Sheet: S37_larval specific
Common elements in T1-T4 T2-T4 T3-T4 :
Ityp15173
Ityp04510
Ityp12211
Ityp05085
Ityp05003
Ityp00550
Ityp14071
Ityp00227
Ityp11071
Ityp23298
Ityp16835
Ityp05530
Ityp04264
Ityp11461
Ityp07634
Ityp11371
Ityp10184
Ityp09237
Ityp05956
Ityp03119
Ityp01014
Ityp02634
Ityp04076
Ityp07592
Ityp02679
Ityp05647
Ityp12711
Ityp06784
Ityp06054
Ityp12599
Ityp08128
Ityp07454
Ityp01036
Ityp02841
Ityp07458
Ityp10599
Ityp21091
Ityp15098
Ityp03695
Ityp01192
Ityp12141
Ityp06096
Ityp09916
Ityp05153
Ityp17361
Ityp04987
Ityp08288
Ityp04906
Ityp00014
Ityp21057
Ityp12196
Ityp04897
Ityp11532
Ityp06055
Ityp02661
Ityp11483
Ityp13891
Ityp03097
Ityp16836
Ityp05751
Ityp05106
Ityp03793
Ityp04103
Ityp05005
Ityp15673
Ityp16361
Ityp14702
Ityp00251
Ityp11535
Ityp07856
Ityp15348
Ityp12118
Ityp17297
Ityp08209
Ityp00057
Ityp05593
Ityp01260
Ityp17317
Ityp05646
Ityp07215
Ityp15000
Ityp21058
Ityp01716
Ityp10154
Ityp10086
Ityp14590
Ityp04353
Ityp12598
Ityp14556
Ityp11574
Ityp12070
Ityp08578
Ityp06376
Ityp02659
Ityp20890
Ityp04110
Ityp12684
Ityp10005
Ityp22476
Ityp00109
Ityp07785
Ityp12146
Ityp01517
Ityp01450
Ityp04111
Ityp01516
Ityp17328
Ityp10668
Ityp00323
Ityp02354
Ityp16470
Ityp04270
Ityp22475
Ityp11994
Ityp05353
Ityp05694
Ityp06292
Ityp12802
Ityp05871
Ityp22201
Ityp08418
Ityp12704
Ityp00342
Ityp05017
Ityp01465
Ityp06975
Ityp05999
Ityp07368
Ityp01165
Ityp05864
Ityp04016
Ityp01849
Ityp10734
Ityp12174
Ityp15114
Ityp02472
Ityp00351
Ityp22277
Ityp01057
Ityp10546
Ityp10139
Ityp01485
Ityp10718
Ityp02281
Ityp10023
Ityp08186
Ityp04484
Ityp17886
Ityp08903
Ityp05086
Ityp06463
Ityp02534
Ityp03954
Ityp08439
Ityp01652
Ityp02514
Ityp10010
Ityp10732
Ityp19454
Ityp14878
Ityp15196
Ityp06023
Ityp00322
Ityp11694
Ityp05279
Ityp10194
Ityp20280
Ityp03395
Ityp10869
Ityp06610
Ityp15124
Ityp02224
Ityp05918
Ityp09414
Ityp22437
Ityp14874
Ityp12210
Ityp19749
Ityp23327
Ityp10140
Ityp12562
Ityp23922
Ityp06561
Ityp16890
Ityp07587
Ityp07382
Ityp01349
Ityp12321
Ityp05004
Ityp12139
Ityp03580
Ityp09108
Ityp12065
Ityp15115
Ityp01842
Ityp08104
Ityp17902
Ityp07723
Ityp03114
Ityp12382
Ityp01619
Ityp08369
Ityp12357
Ityp12001
Ityp00439
Ityp01200
Ityp02042
Ityp01518
Ityp18036
Ityp11243
Ityp02640
Ityp00543
Ityp12787
Ityp08771
Ityp06075
Ityp04322
Ityp09026
Ityp14252
Ityp10609
Ityp04267
Ityp18062
Ityp10182
Ityp04075
Ityp11669
Ityp02352
Ityp18356
Ityp10066
Ityp09942
Ityp02722
Ityp09012
Ityp10735
Ityp04328
Ityp01863
Ityp03316
Ityp10058
Ityp03929
Ityp00032
Ityp01181
Ityp09911
Ityp00368
Ityp02690
Ityp04974
Ityp07485
Ityp12344
Ityp03590
Ityp17403
Ityp04976
Ityp16399
Ityp07044
Ityp13713
Ityp02442
Ityp05972
Ityp00679
Ityp10165
Ityp14095
Ityp03925
Ityp08843
Ityp15116
Ityp11499
Ityp10183
Ityp07412
Ityp03521
Ityp17327
Ityp11333
Ityp12112
Ityp07253
Ityp11261
Ityp07802
Ityp20508
Ityp18308
Ityp02614
Ityp12744
Ityp04209
Ityp04443
Ityp14309
Ityp12402
Ityp14062
Ityp07975
Ityp00360
Ityp03168
Ityp14982
Ityp11505
Ityp12312
Ityp07446
Ityp02750
Ityp18403
Ityp12750
Ityp11541
Ityp17247
Ityp07219
Ityp07609
Ityp04944
Ityp21063
Ityp04975
Ityp09146
Ityp03857
Ityp04039
Ityp03928
Ityp20912
Ityp04095
Ityp01931
Ityp08628
Ityp18402
Ityp15674
Ityp08327
Ityp10097
Ityp11211
Ityp10941
Ityp04078
Ityp13684
Ityp06677
Ityp05961
Ityp08571
Ityp09828
Ityp20051
Ityp09648
Ityp00752
Ityp03589
Ityp09785
Ityp17781
Ityp01806
Ityp00382
Ityp17270
Ityp10563
Ityp08388
Ityp02893
Ityp11059
Ityp15097
Ityp21311
Ityp11044
Ityp11229
Ityp08792
Ityp07146
Ityp09317
Ityp00172
Ityp07329
Ityp14833
Ityp00874
Ityp07523
Ityp09169
Ityp08403
Ityp10307
Ityp12000
Ityp03634
Ityp09267
Ityp09066
Ityp12273
Ityp14212
Ityp07660
Ityp15211
Ityp04871
Ityp17863
Ityp08579
Ityp00525
Ityp09524
Ityp14636
Ityp01743
Ityp09051
Ityp08358
Ityp03800
Ityp03963
Ityp04945
Ityp11647
Ityp08299
Ityp02394
Ityp05508
Ityp17326
Ityp03625
Ityp21648
Ityp11016
Ityp11276
Ityp21672
Ityp12250
Ityp07296
Ityp13536
Ityp10365
Ityp09453
Ityp04382
Ityp03151
Ityp22445
Ityp01435
Ityp12067
Ityp16324
Ityp08768
Ityp13606
Ityp11866
Ityp15483
Ityp09811
Ityp04617
Ityp12850
Ityp17988
Ityp22180
Ityp05054
Ityp07414
Ityp07659
Ityp06856
Ityp08793
Ityp10973
Ityp05149
Ityp01762
Ityp07905
Ityp02345
Ityp13812
Ityp10042
Ityp09456
Ityp10063
Ityp07308
Ityp10412
Ityp13603
Ityp08902
Ityp12751
Ityp12330
Ityp10748
Ityp02172
Ityp11664
Ityp02689
Ityp03501
Ityp06110
Ityp02950
Ityp19496
Ityp12749
Ityp14251
Ityp12552
Ityp07676
Ityp12458
Ityp03289
Ityp12249
Ityp08966
Ityp10850
Ityp12659
Ityp00974
Ityp18691
Ityp02718
Ityp12748
Ityp14685
Ityp07232
Ityp06981
Ityp06243
Ityp12955
Ityp10746
Ityp01610
Ityp17375
Ityp13726
Ityp18463
Ityp14060
Ityp06959
Ityp06973
Ityp03555
Ityp21957
Ityp00182
Ityp15561
Ityp04446
Ityp12724
Ityp01134
Ityp18682
Ityp10733
Ityp16871
Ityp12752
Ityp04899
Ityp02396
Ityp01202
Ityp01782
Ityp00030
Ityp10325
Ityp05151
Ityp12329
Ityp12746
Ityp22926
Ityp08133
Ityp14461
Ityp13125
Ityp02813
Ityp11586
Ityp03460
Ityp05975
Ityp09928
Ityp00404
Ityp10679
Ityp18437
Ityp00608
Ityp08182
Ityp08533
Ityp15547
Ityp13601
Ityp15254
Ityp01540
Ityp03722
Ityp18061
Ityp02851
Ityp01854
Ityp10022
Ityp02137
Ityp07218
Ityp20119
Ityp03392
Ityp13947
Ityp05880
Ityp20278
Ityp01366
Ityp04986
Ityp20727
Ityp01616
Ityp22966
Ityp08777
Ityp03602
Ityp13363
Ityp03385
Ityp01861
Ityp07545
Ityp02255
Ityp10751
Ityp15557
Ityp16371
Ityp08185
Ityp14884
Ityp16027
Ityp01501
Ityp14161
Ityp06071
Ityp18997
Ityp20791
Ityp12313
Ityp12074
Ityp08255
Ityp16428
Ityp12367
Ityp18110
Ityp04290
Ityp06291
Ityp14215
Ityp19193
Ityp04616
Ityp15061
Ityp22147
Ityp13658
Ityp13864
Ityp00181
Ityp02636
Ityp04447
Ityp00105
Ityp00665
Ityp07366
Ityp09775
Ityp04309
Ityp09767
Ityp08905
Ityp11480
Ityp07749
Ityp15909
Ityp20275
Ityp10873
Ityp00273
Ityp12678
Ityp01133
Ityp22415
Ityp02937
Ityp06935
Ityp12372
Ityp17446
Ityp15182
Ityp11074
Ityp00917
Ityp01338
Ityp01016
Ityp09550
Ityp21863
Ityp17793
Ityp03437
Ityp06927
Ityp20509
Ityp03748
Ityp18681
Ityp06290
Ityp09225
Ityp04280
Ityp23479
Ityp16323
Ityp05119
Ityp14779
Ityp09729
Ityp12241
Ityp07069
Ityp02193
Ityp22474
Ityp05582
Ityp00592
Ityp07292
Ityp04712
Ityp12742
Ityp02314
Ityp16842
Ityp11524
Ityp02958
Ityp00479
Ityp12849
Ityp02135
Ityp12581
Ityp03108
Ityp01875
Ityp01213
Ityp04936
Ityp10453
Ityp04015
Ityp01606
Ityp15832
Ityp09875
Ityp04007
Ityp09779
Ityp01971
Ityp18071
Ityp14763
Ityp04170
Ityp14677
Ityp08455
Ityp10531
Ityp08198
Ityp15551
Ityp01570
Ityp01807
Ityp11408
Ityp10991
Ityp09334
Ityp14511
Ityp01046
Ityp12723
Ityp00028
Ityp10070
Ityp17111
Ityp11878
Ityp02504
Ityp04127
Ityp04231
Ityp04670
Ityp03973
Ityp10392
Ityp12294
Ityp13607
Ityp01932
Ityp12450
Ityp04014
Ityp19181
Ityp04968
Ityp07654
Ityp00610
Ityp05242
Ityp17321
Ityp01318
Ityp10942
Ityp14505
Ityp06295
Ityp12747
Ityp01852
Ityp11001
Ityp10011
Ityp02473
Ityp18685
Ityp05411
Ityp12068
Ityp17429
Ityp12262
Ityp00975
Ityp15200
Ityp14875
Ityp18006
Ityp05391
Ityp00659
Ityp06256
Ityp04294
Ityp04965
Ityp07181
Ityp02082
Ityp06059
Ityp14052
Ityp08231
Ityp04059
Ityp20908
Ityp17121
Ityp12775
Ityp10339
Ityp13407
Ityp02192
Ityp05705
Ityp05945
Ityp11585
Ityp04109
Ityp05752
Ityp03808
Ityp15168
Ityp19610
Ityp22545
Ityp09506
Ityp00473
Ityp04950
Ityp01745
Ityp06541
Ityp03718
Ityp13559
Ityp13364
Ityp12644
Ityp01167
Ityp17343
Ityp10476
Ityp01583
Ityp14498
Ityp12759
Ityp06443
Ityp17799
Ityp02895
Ityp12328
Ityp14971
Ityp03735
Ityp03334
Ityp02984
Ityp11443
Ityp01696
Ityp05066
Ityp12474
Ityp08837
Ityp07340
Ityp10641
Ityp05273
Ityp04454
Ityp01320
Ityp22939
Ityp08175
Ityp07841
Ityp20907
Ityp19764
Ityp01214
Ityp09840
Ityp09085
Ityp13113
Ityp16368
Ityp05440
Ityp07668
Ityp07200
Ityp21905
Ityp01818
Ityp05371
Ityp10398
Ityp13042
Ityp04753
Ityp05891
Ityp13776
Ityp17091
Ityp06987
Ityp13106
Ityp00839
Ityp04313
Ityp05416
Ityp06312
Ityp03600
Ityp09790
Ityp20906
Ityp08910
Ityp17816
Ityp12152
Ityp07824
Ityp02967
Ityp02513
Ityp21036
Ityp12755
Ityp15059
Ityp05568
Ityp06289
Ityp03704
Ityp07792
Ityp05355
Ityp06703
Ityp17372
Ityp04579
Ityp00482
Ityp13543
Ityp02022
Ityp04508
Ityp20296
Ityp15550
Ityp14999
Ityp07361
Ityp08657
Ityp07064
Ityp07821
Ityp02159
Ityp09022
Ityp17084
Ityp08276
Ityp11915
Ityp00156
Ityp10091
Ityp01426
Ityp05337
Ityp17899
Ityp17298
Ityp13589
Ityp04664
Ityp04553
Ityp12544
Ityp11563
Ityp15036
Ityp09352
Ityp19441
Ityp19593
Ityp09142
Ityp00972
Ityp07763
Ityp09270
Ityp05746
Ityp13972
Ityp15361
Ityp09370
Ityp04373
Ityp09145
Ityp09182
Ityp01158
Ityp07422
Ityp04098
Ityp04790
Ityp06752
Ityp13167
Ityp08544
Ityp05820
Ityp14470
Ityp03876
Ityp04964
Ityp15599
Ityp17659
Ityp12729
Ityp15907
Ityp04488
Ityp16916
Ityp05412
Ityp06909
Ityp17257
Ityp07459
Ityp03534
Ityp11253
Ityp09188
Ityp03760
Ityp17097
Ityp13338
Ityp05013
Ityp03674
Ityp14684
Ityp11935
Ityp08354
Ityp13665
Ityp12131
Ityp08022
Ityp00126
Ityp04285
Ityp03936
Ityp08958
Ityp03436
Ityp05628
Ityp03723
Ityp12641
Ityp02729
Ityp08181
Ityp02949
Ityp17251
Ityp11827
Ityp06149
Ityp12057
Ityp03692
Ityp10053
Ityp00236
Ityp01230
Ityp07154
Ityp13957
Ityp07476
Ityp10598
Ityp06399
Ityp13567
Ityp09956
Ityp03164
Ityp07836
Ityp13965
Ityp20271
Ityp04006
Ityp17060
Ityp12286
Ityp10468
Ityp11558
Ityp03298
Ityp13138
Ityp09050
Ityp12999
Ityp00997
Ityp13081
Ityp00735
Ityp03314
Ityp08471
Ityp14113
Ityp01859
Ityp15937
Ityp07255
Ityp10146
Ityp13823
Ityp04929
Ityp07211
Ityp01763
Ityp02163
Ityp00794
Ityp01164
Ityp13146
Ityp03965
Ityp10695
Ityp17984
Ityp00966
Ityp00615
Ityp07424
Ityp09121
Ityp10777
Ityp15154
Ityp10914
Ityp09857
Ityp04544
Ityp01704
Ityp08879
Ityp01976
Ityp14538
Ityp11067
Ityp17795
Ityp06035
Ityp15598
Ityp01474
Ityp13350
Ityp10862
Ityp17376
Ityp11545
Ityp09760
Ityp08653
Ityp11089
Ityp02541
Ityp13092
Ityp21015
Ityp14629
Ityp11087
Ityp02699
Ityp08334
Ityp10587
Ityp14097
Ityp16460
Ityp03720
Ityp03811
Ityp04827
Ityp12979
Ityp03291
Ityp13302
Ityp11400
Ityp01530
Ityp21940
Ityp13236
Ityp05200
Ityp03958
Ityp16332
Ityp08776
Ityp09898
Ityp04357
Ityp13015
Ityp08589
Ityp08931
Ityp03279
Ityp04324
Ityp08993
Ityp02219
Ityp03233
Ityp03771
Ityp13379
Ityp01150
Ityp10162
Ityp20272
Ityp12453
Ityp13923
Ityp19588
Ityp17269
Ityp03917
Ityp02016
Ityp14036
Ityp08450
Ityp14602
Ityp11985
Ityp04545
Ityp07860
Ityp09789
Ityp15874
Ityp18426
Ityp04578
Ityp17798
Ityp03258
Ityp11548
Ityp20653
Ityp13378
Ityp04279
Ityp14772
Ityp14132
Ityp15312
Ityp02449
Ityp12336
Ityp08557
Ityp04546
Ityp01789
Ityp11065
Ityp08469
Ityp22883
Ityp04603
Ityp04122
Ityp20575
Ityp15890
Ityp11686
Ityp13392
Ityp15833
Ityp10784
Ityp06047
Ityp11959
Ityp07160
Ityp04472
Ityp10934
Ityp02496
Ityp09784
Ityp04667
Ityp06282
Ityp10851
Ityp21520
Ityp01641
Ityp03764
Ityp08005
Ityp04802
Ityp01053
Ityp12460
Ityp15902
Ityp01703
Ityp07542
Ityp08841
Ityp19425
Ityp15938
Ityp13220
Ityp12405
Ityp19741
Ityp08635
Ityp14053
Ityp09841
Ityp04870
Ityp07748
Ityp08863
Ityp08237
Ityp12008
Ityp03756
Ityp07656
Ityp01692
Ityp10670
Ityp17724
Ityp11282
Ityp04937
Ityp04615
Ityp10088
Ityp04047
Ityp11891
Ityp14112
Ityp09354
Ityp10430
Ityp12538
Ityp04126
Ityp14932
Ityp03391
Ityp09383
Ityp03368
Ityp11187
Ityp01047
Ityp02383
Ityp02018
Ityp18014
Ityp08869
Ityp01938
Ityp04310
Ityp01659
Ityp07729
Ityp03939
Ityp08459
Ityp01421
Ityp01274
Ityp15797
Ityp23784
Ityp06615
Ityp04999
Ityp06616
Ityp09954
Ityp10910
Ityp15255
Ityp05567
Ityp03398
Ityp17169
Ityp06449
Ityp01878
Ityp07287
Ityp04053
Ityp17163
Ityp07735
Ityp01607
Ityp15623
Ityp15823
Ityp03438
Ityp11254
Ityp06402
Ityp01381
Ityp09204
Ityp04101
Ityp22173
Ityp15889
Ityp00745
Ityp20511
Ityp05926
Ityp07398
Ityp04031
Ityp14499
Ityp14323
Ityp11500
Ityp01354
Ityp08190
Ityp14302
Ityp00860
Ityp03806
Ityp12492
Ityp07274
Ityp13305
Ityp17066
Ityp14803
Ityp10879
Ityp04731
Ityp12018
Ityp22102
Ityp21027
Ityp18022
Ityp04058
Ityp07419
Ityp06579
Ityp01122
Ityp08559
Ityp00956
Ityp11673
Ityp07576
Ityp05942
Ityp00869
Ityp01091
Ityp02117
Ityp07967
Ityp07395
Ityp12155
Ityp08870
Ityp00822
Ityp14625
Ityp04811
Ityp17318
Ityp02888
Ityp12380
Ityp16345
Ityp10687
Ityp13244
Ityp17153
Ityp12795
Ityp12240
Ityp05548
Ityp13304
Ityp00435
Ityp19608
Ityp08246
Ityp13386
Ityp12537
Ityp16954
Ityp08269
Ityp07734
Ityp13333
Ityp12230
Ityp12409
Ityp09998
Ityp04629
Ityp04677
Ityp17741
Ityp15156
Ityp04916
Ityp13000
Ityp12727
Ityp14718
Ityp02807
Ityp11101
Ityp21895
Ityp10803
Ityp01635
Ityp03802
Ityp10422
Ityp19747
